# Supplementary material for: The TMEM16A channel mediates the fast polyspermy block in Xenopus laevis
Source: PubMed Central journal article supplement — J Gen Physiol. 2018 Sep 3;150(9):1249–59. doi: 10.1085/jgp.201812071 (PMC6122928; doi:10.1085/jgp.201812071), 2018-09-03
Supplement: JGP_201812071_sm.pdf [file JGP_201812071_sm.pdf]

## Supplemental material

Wozniak et al., <https://doi.org/10.1085/jgp.201812071>

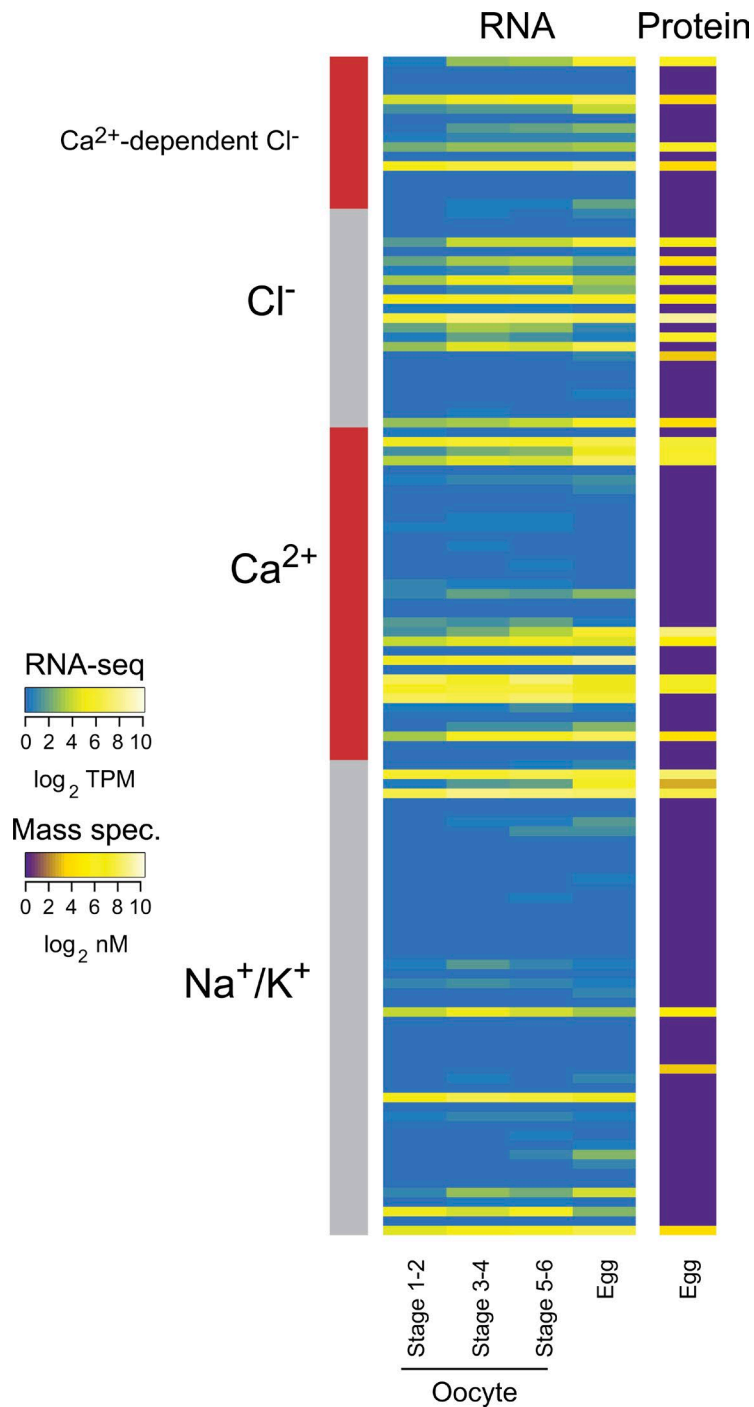

Figure S1. **Ion channel expression in *X. laevis* oocytes and eggs.** Left: Heatmaps showing RNA expression levels (based on RNA-seq from Session et al., 2016) as  $\log_2$  transcripts per million (TPM). Right: Heatmaps showing protein concentrations (based on mass spectrometry from Wühr et al. 2014) in  $\log_2$  nanomolar. Transcripts and proteins are grouped by channel type.

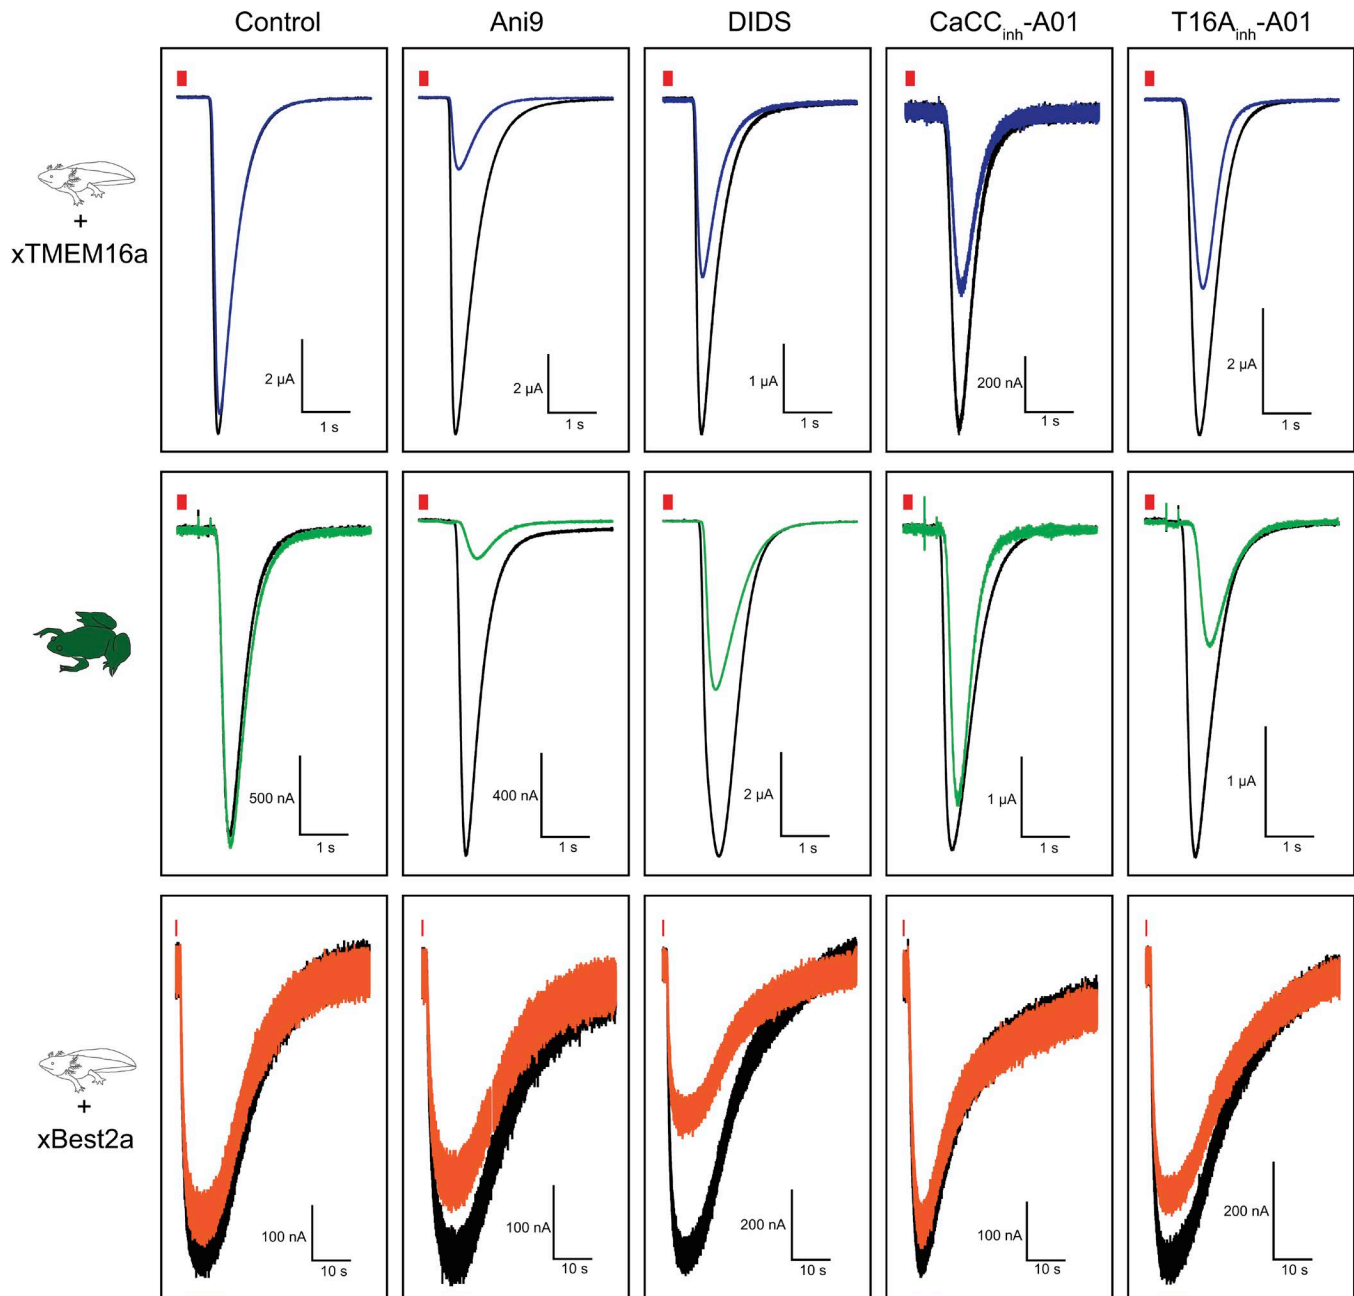

Figure S2. **IP<sub>3</sub>-evoked currents in various inhibitors.** Representative current traces evoked by IP<sub>3</sub> uncaging in axolotl oocytes expressing xTMEM16A (top) or xBEST2A (bottom) and in wild-type *X. laevis* oocytes (middle). Shown are typical traces before (black) and after (colored) application of a control solution, Ani9, DIDS, CaCC<sub>inh</sub>-A01, or T16A<sub>inh</sub>-A01. Red bars denote the 250-ms UV exposure.

Table S1. **Inhibition of Ca<sup>2+</sup>-activated current using Cl<sup>-</sup> channel inhibitors**

|                             | Control | 10 μM MONNA | 1 μM Ani9 | 30 μM T16A <sub>inh</sub> -A01 | 10 μM CaCC <sub>inh</sub> -A01 | 7.5 μM DIDS |
|-----------------------------|---------|-------------|-----------|--------------------------------|--------------------------------|-------------|
| xTMEM16A in axolotl oocytes | 5 ± 3   | 72 ± 3      | 76 ± 5    | 46 ± 11                        | 35 ± 7                         | 46 ± 2      |
| <i>X. laevis</i> oocytes    | 2 ± 4   | 87 ± 2      | 80 ± 4    | 45 ± 13                        | 25 ± 11                        | 47 ± 7      |
| xBEST2A in axolotl oocytes  | 7 ± 4   | 10 ± 8      | 22 ± 7    | 26 ± 4                         | 9 ± 3                          | 29 ± 7      |

Mean ± SEM percentage of current inhibition seen for uncaging experiments is reported. The number of independent observations for each treatment is  $n = 8-16$  for MONNA,  $n = 5-8$  for Ani9,  $n = 6-7$  for T16A<sub>inh</sub>-A01,  $n = 6-10$  for CaCC<sub>inh</sub>-A01, and  $n = 6-7$  DIDS.
